# Supplementary material for: Relative Biological Effectiveness of Carbon Ions for Head-and-Neck Squamous Cell Carcinomas According to Human Papillomavirus Status
Source: PubMed Central journal article supplement (PMC7565683; doi:10.3390/jpm10030071), 2020-07-25

**Table S1.**  $\alpha$  and  $\beta$  parameters for X-rays or carbon ions for HPV-positive and -negative lines.

| Cell line   | HPV status | X-rays   |         | Carbon ions |         |
|-------------|------------|----------|---------|-------------|---------|
|             |            | $\alpha$ | $\beta$ | $\alpha$    | $\beta$ |
| UD-SCC-2    | Positive   | 0.10     | 0.080   | 0.82        | 0.043   |
| UM-SCC-47   | Positive   | 0.42     | 0.019   | 0.046       | 0.49    |
| UM-SCC-104  | Positive   | 0.19     | 0.027   | 1.21        | -0.060  |
| UPCI:SCC154 | Positive   | 0.72     | -0.010  | 0.67        | 0.11    |
| A-253       | Negative   | 0.43     | -0.0090 | 0.73        | 0.0090  |
| Detroit 562 | Negative   | 0.17     | 0.0050  | 0.32        | 0.073   |
| FaDu        | Negative   | 0.13     | 0.012   | 0.66        | 0.016   |
| SCC-9       | Negative   | 0.44     | 0.018   | 0.55        | 0.010   |
| SCC-25      | Negative   | 0.27     | 0.036   | 0.75        | 0.098   |
| UM-SCC-1    | Negative   | 0.12     | 0.013   | 0.57        | 0.062   |

HPV, human papillomavirus; HNSCC, head and neck squamous cell carcinoma.

**Figure S1**

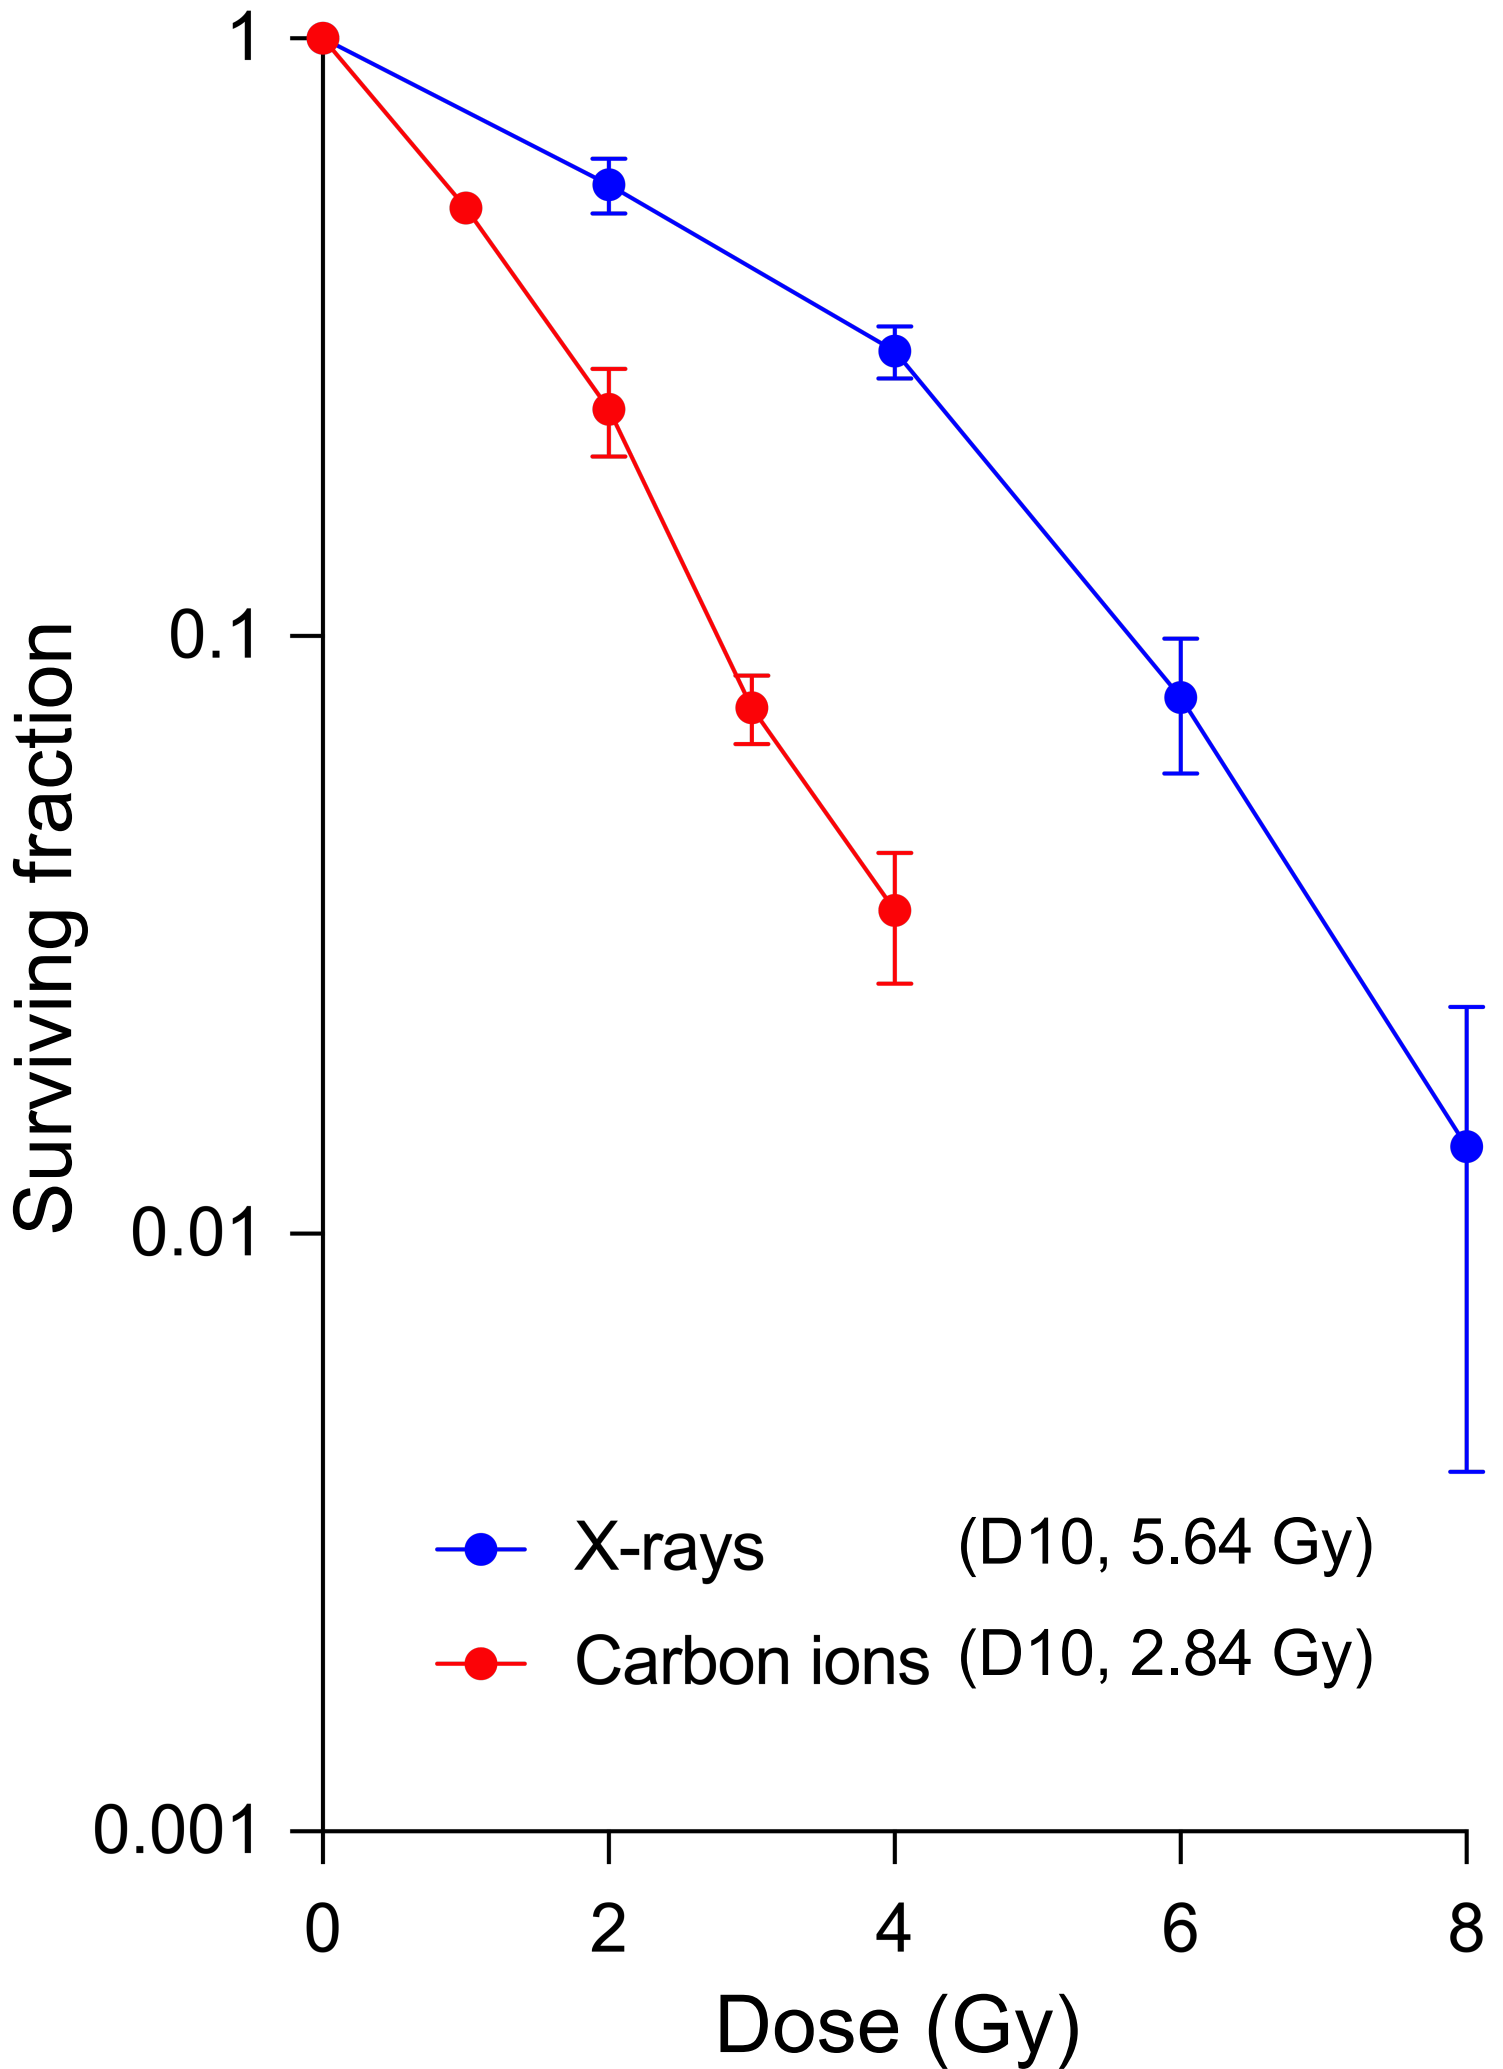

Supplement: jpm-10-00071-s001.pdf [file jpm-10-00071-s001.pdf]
